# Supplementary material for: Short senolytic or senostatic interventions rescue progression of radiation-induced frailty and premature ageing in mice
Source: eLife journal article supplement (doi:10.7554/elife.75492), 2022-05-04
Supplement: supp [file elife_poa_e75492_Figure_4_source_data_1.xlsx]

## Sheet: source data Fig4E
	GM-CSF (20)	IFNy (25)	IL-1B (46)	IL-2 (48)	IL-4 (53)	IL-5 (55)	IL-6 (57)	IL-8 (63)	IL-10 (27)	IL-12(p70) (33)	IL-13 (35)	IL-17A (39)	IL-23 (54)	TNFa (75)	per flask (*10^4)
5ml media (pg/mL)
Y	0.765	0.195	0.075	#DIV/0!	#DIV/0!	#DIV/0!	38.945	171.49	0.26	#DIV/0!	0.08	0.33	15.86	0.05	111.2
IR con	3.865	0.215	0.135	0.185	0.945	#DIV/0!	374.49	1136.51	0.375	#DIV/0!	0.13	0.465	14.185	0.065	21.504
50uM met	1.845	0.17	0.16	0.185	0.67	#DIV/0!	218.54	627.25	0.355	#DIV/0!	0.16	0.295	20.045	0.05	36.4
100uM met	2.4	0.255	0.135	0.365	0.945	#DIV/0!	204.21	469.495	0.375	#DIV/0!	0.29	0.23	22.55	0.065	31.424
2mM met	0.71	0.275	0.09	0.21	0.945	#DIV/0!	88.685	89.09	0.185	#DIV/0!	0.195	0.13	17.535	0.055	19.21
per cell (pg/mL)
Y	68.795	17.536	6.7446	#DIV/0!	#DIV/0!	#DIV/0!	3502.25	15421.8	23.3813	#DIV/0!	7.19424	29.6763	1426.26	4.4964
IR con	1797.34	99.9814	62.779	86.0305	439.453	#DIV/0!	174149	528511	174.386	#DIV/0!	60.4539	216.239	6596.45	30.2269
50uM met	506.868	46.7033	43.956	50.8242	184.066	#DIV/0!	60038.5	172321	97.5275	#DIV/0!	43.956	81.044	5506.87	13.7363
100uM met	763.747	81.1482	42.9608	116.153	300.726	#DIV/0!	64985.4	149407	119.336	#DIV/0!	92.2862	73.1925	7176.04	20.6848
2mM met	369.599	143.155	46.8506	109.318	491.931	#DIV/0!	46166.1	46376.9	96.304	#DIV/0!	101.51	67.6731	9128.06	28.6309
