# Supplementary figures and images for: Short senolytic or senostatic interventions rescue progression of radiation-induced frailty and premature ageing in mice
Source: eLife journal article supplement (doi:10.7554/elife.75492), 2022-05-04

Y IR Met

NOX4 ->

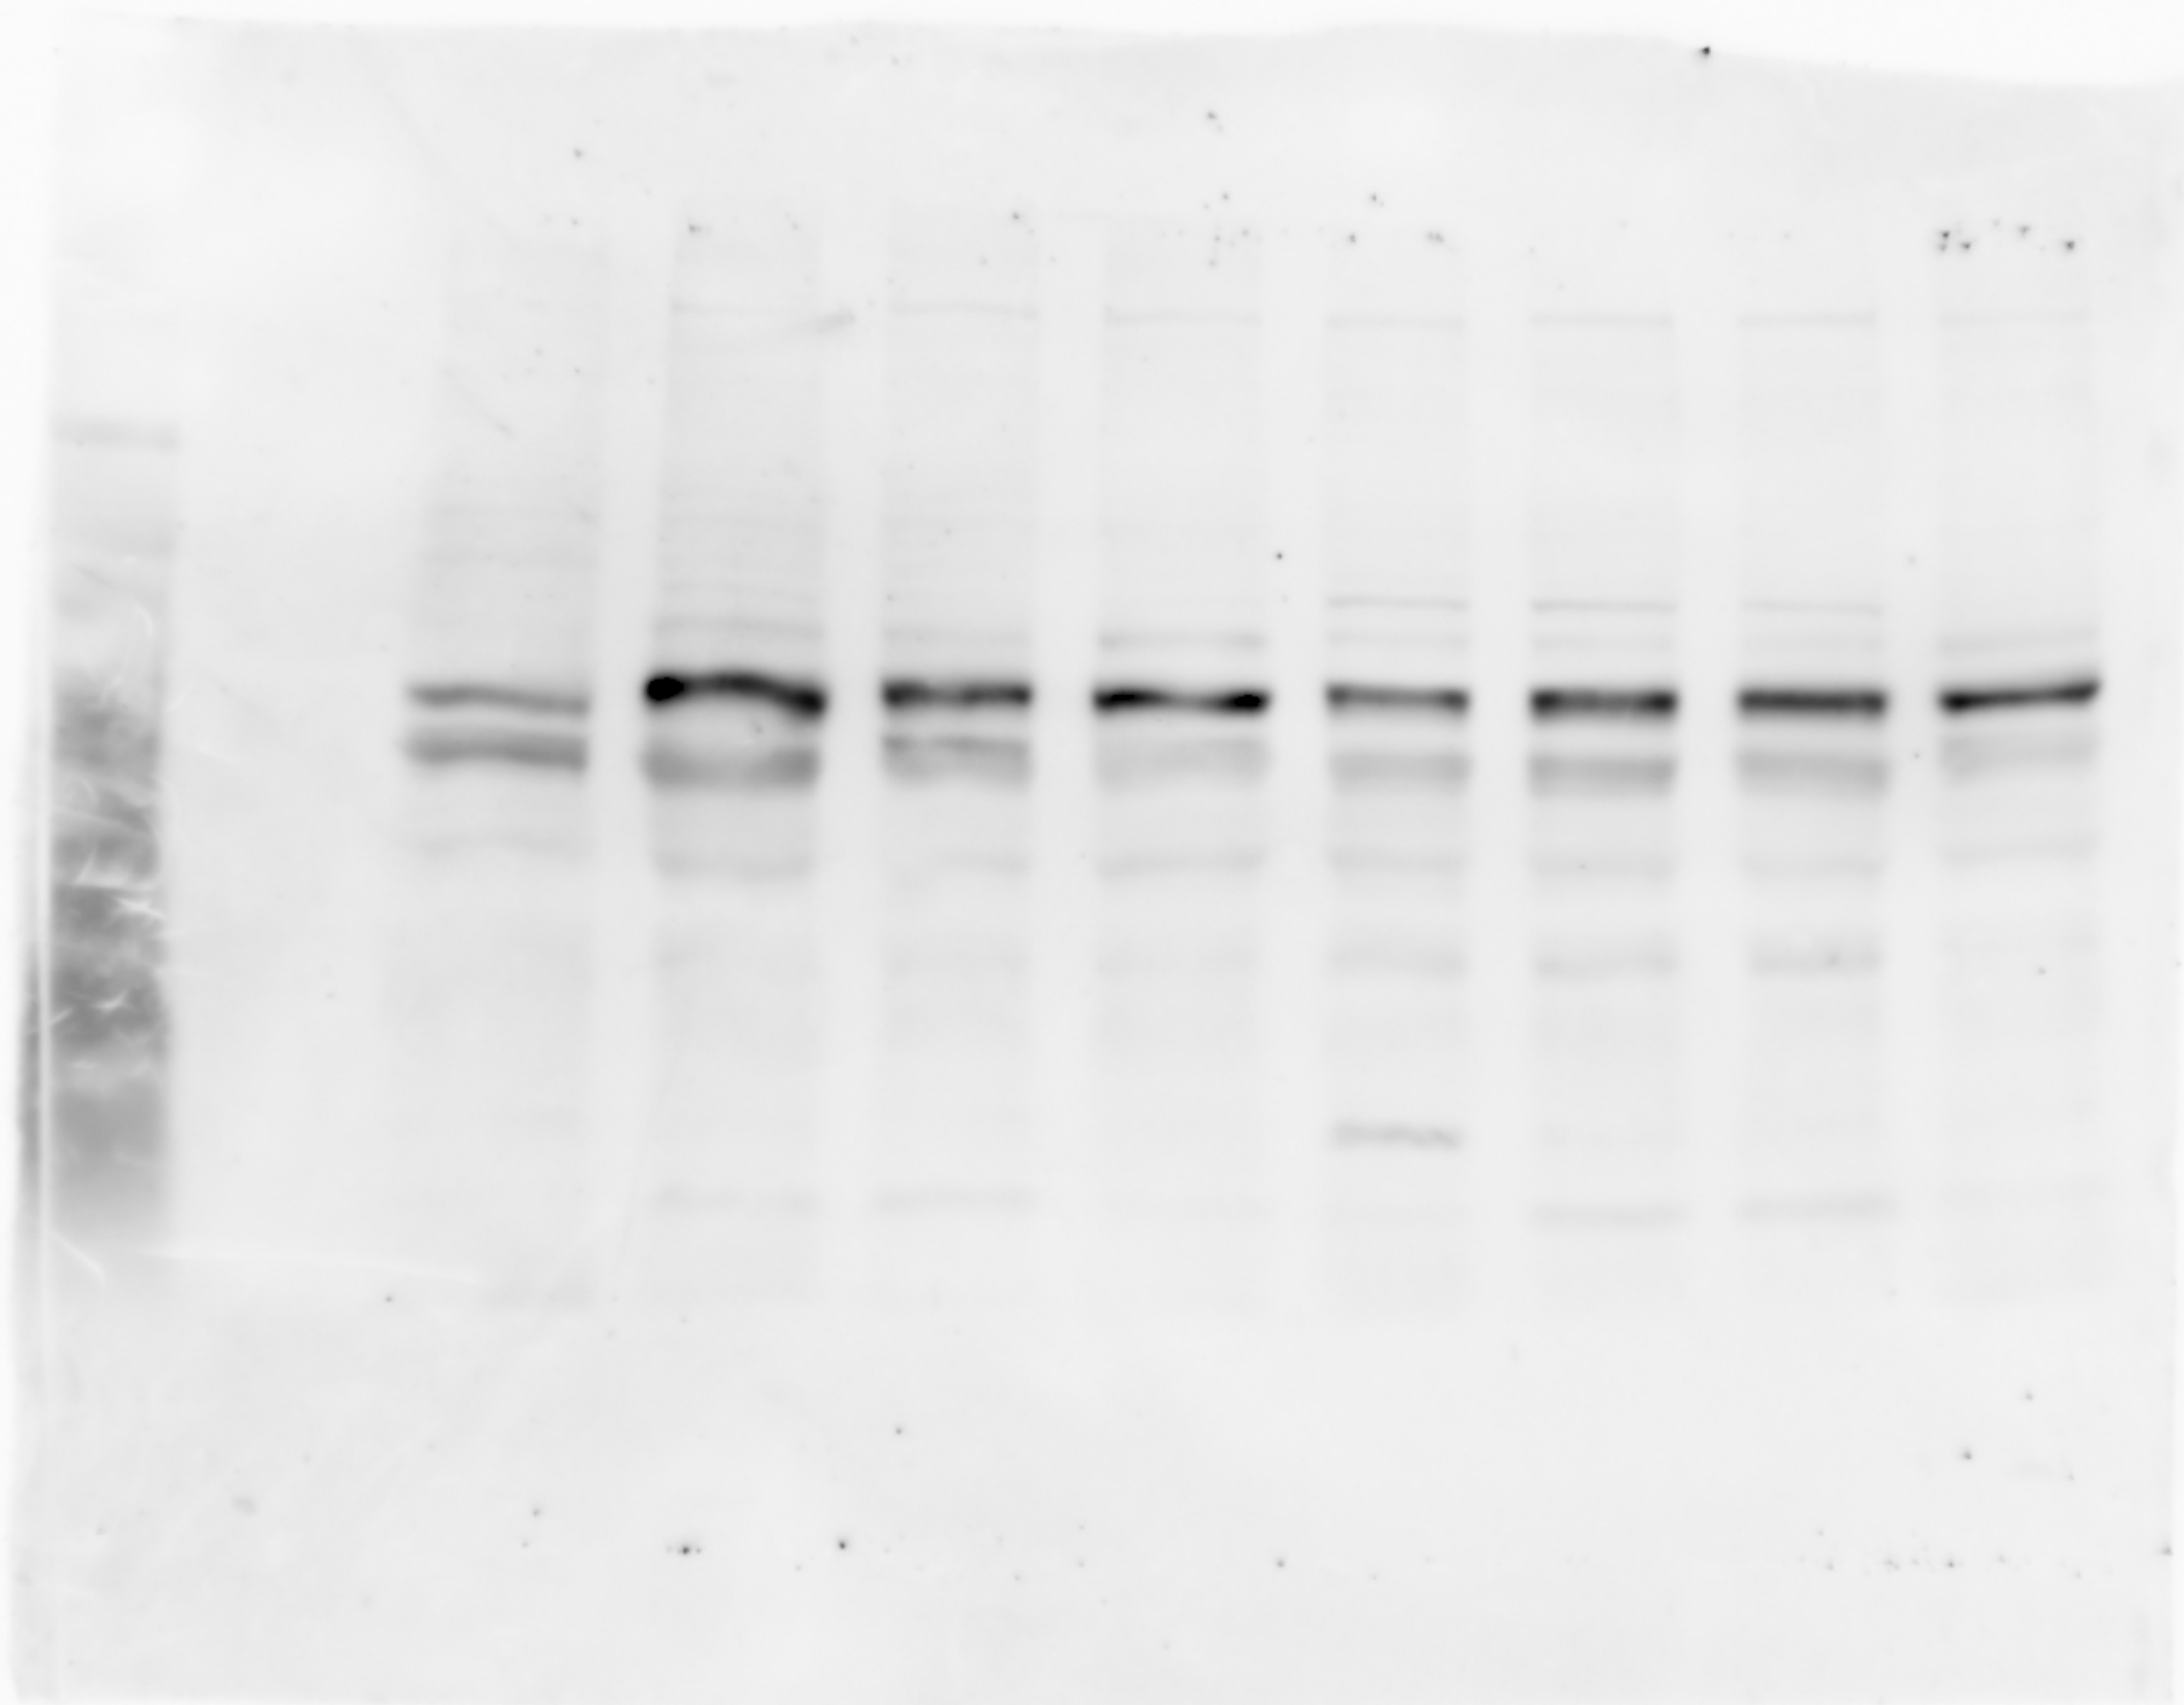

Supplement: supp [file elife-75492-supp-v1.zip]
